# Supplementary material for: Congestion Pricing for Aircraft Pushback Slot Allocation
Source: PLoS One. 2017 Jan 23;12(1):e0170553. doi: 10.1371/journal.pone.0170553 (PMC5256938; doi:10.1371/journal.pone.0170553)
Supplement: S1 Dataset — (XLSX) [file pone.0170553.s001.xlsx]

## Sheet: Aircraft data
S1 Dataset. Aircraft and slot data.
NO.	Flight Number	Destination city	fit1	Aircraft type	Boarding gate	Pushback length (m)	Taxiing length (m)	tipush (min)	titaxi(min)	fiapply	citaxi (CNY/min)
1	ZH9637	SHE	13:00:00	320	235	177.5	3466.1	2.13855	13.8644	12:57:00	29.762
2	CZ6369	JHG	13:05:00	73G	221	92	2591.5	1.10843	10.366	13:02:00	29.3738
3	8L9954	KMG	13:10:00	73V	241	146	3692.4	1.75904	14.7696	13:06:00	29.3738
4	PN6281	JJN	13:10:00	320	252	101.9	4205.4	1.22771	16.8216	13:07:00	29.762
5	GS6508	URC	13:15:00	32G	245	92.1	3884.3	1.10964	15.5372	13:11:00	29.762
6	CZ6359	HRB	13:15:00	320	211	92	2572	1.10843	10.288	13:12:00	29.762
7	ZH9435	NNG	13:20:00	738	240	157	3635	1.89157	14.54	13:17:00	29.3738
8	ZH9437	HAK	13:25:00	320	239	157	3563.4	1.89157	14.2536	13:21:00	29.762
9	FM9390	PVG	13:25:00	738	8	114	1942	1.37349	7.768	13:22:00	29.3738
10	JD5400	BAV	13:30:00	319	238	157	3490.1	1.89157	13.9604	13:26:00	29.762
11	KY8258	KMG	13:30:00	738	234	151	3391.3	1.81928	13.5652	13:27:00	29.3738
12	CZ6439	SHE	13:40:00	738	212	131	2572	1.57831	10.288	13:37:00	29.3738
13	CZ3592	DSN	13:45:00	738	213	261	2572	3.14458	10.288	13:41:00	29.3738
14	FM9296	HGH	13:45:00	738	246	114	2877.1	1.37349	11.5084	13:42:00	29.3738
15	GS7523	SYX	13:50:00	32G	243	114	2798.5	1.37349	11.194	13:47:00	29.762
16	CZ3495	KMG	13:55:00	733	222	92	2551	1.10843	10.204	13:51:00	29.3738
17	ZH9149	SHE	13:55:00	738	237	216.7	3417.6	2.61084	13.6704	13:52:00	29.3738

## Sheet: Slot data
Slot	Start time
1	13:00:00
2	13:03:30
3	13:07:00
4	13:10:30
5	13:14:00
6	13:17:30
7	13:21:00
8	13:24:30
9	13:28:00
10	13:31:30
11	13:35:00
12	13:38:30
13	13:42:00
14	13:45:30
15	13:49:00
16	13:52:30
17	13:56:00
